# Supplementary material for: A study to assess the health effects of an anticancer drug (cyclophosphamide) in zebrafish (Danio rerio): eco-toxicity of emerging contaminants
Source: Royal Society of Chemistry journal article supplement (doi:10.1039/d2em00527a), 2023-01-01
Supplement: d2em00527a1.pdf [file d2em00527a1.pdf]

## Electronic Supplementary Information

### A study to assess the health effects of an anticancer drug (cyclophosphamide) in zebrafish (*Danio rerio*): Eco-toxicity of emerging contaminants

Tamilselvan Hema,<sup>a</sup> Sundaram Mohanthy,<sup>a</sup> Sathisaran Umamaheswari,<sup>a</sup> Mathan Ramesh,<sup>a\*</sup> Zongming Ren,<sup>b</sup> and Rama-Krishnan Poopal,<sup>b\*</sup>

<sup>a</sup>Unit of Toxicology, Department of Zoology, Bharathiar University, Coimbatore – 641 046, TamilNadu, India.

<sup>b</sup>Institute of Environment and Ecology, Shandong Normal University, Jinan 250358, People's Republic of China.

Corresponding authors: mathanramesh@yahoo.com; poopalramakrishnan@gmail.com

#### Results

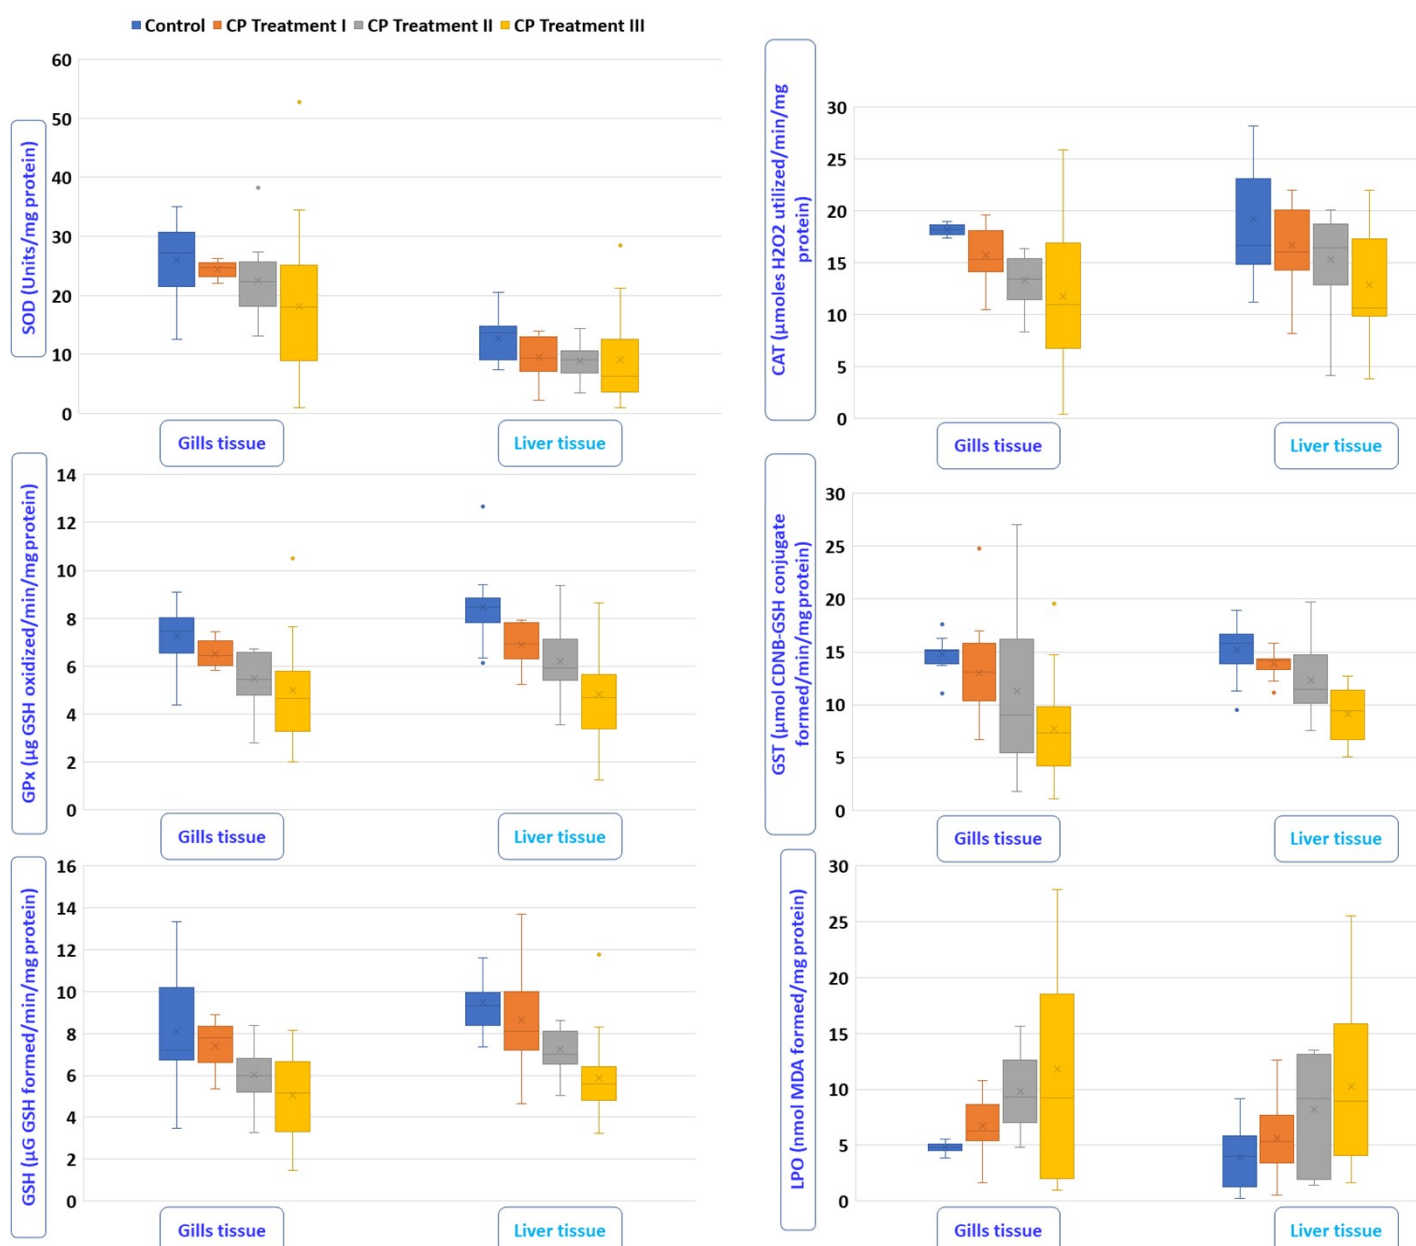

Fig. S1 Overall activity of studied biomarkers in the gills and liver tissues. Study periods 42 days. Twenty zebrafish/tank/time-point.

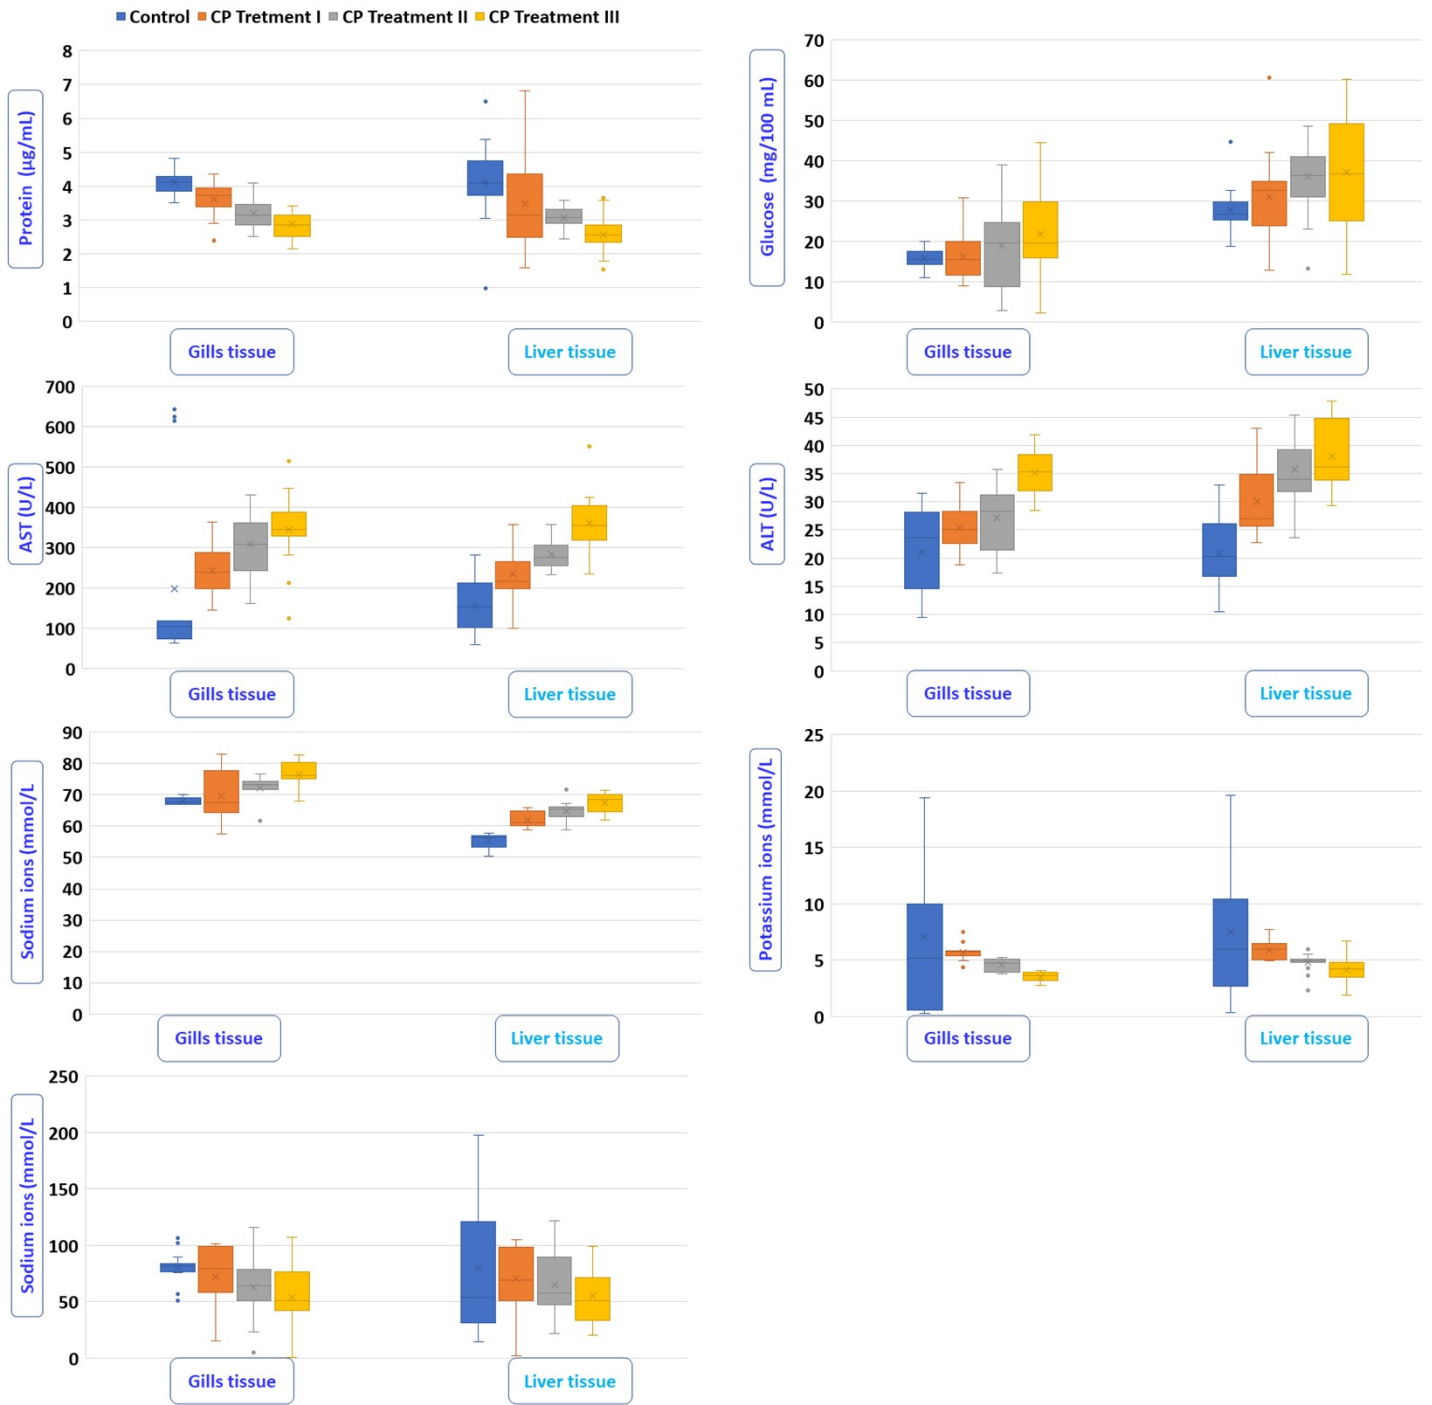

**Fig. S2 Overall activity of studied biomarkers in the gills and liver tissues. Study periods 42 days. Twenty zebrafish/tank/time-point.**
